# Supplementary material for: One-step formation of ultra-thin chemically functionalized redox-active Langmuir–Schaefer Nafion films
Source: Royal Society of Chemistry journal article supplement (doi:10.1039/b709278d), 2007-01-01
Supplement: b709278d.pdf [file b709278d.pdf]

## One-step Formation of Ultra-thin Chemically-Functionalized Redox-Active Langmuir-Schaefer Nafion Films

Paolo Bertoncello\*, Neil R. Wilson, and Patrick R. Unwin\*

Email: [p.r.unwin@warwick.ac.uk](mailto:p.r.unwin@warwick.ac.uk); [p.bertoncello@warwick.ac.uk](mailto:p.bertoncello@warwick.ac.uk)

### Electronic Supporting Information (ESI)

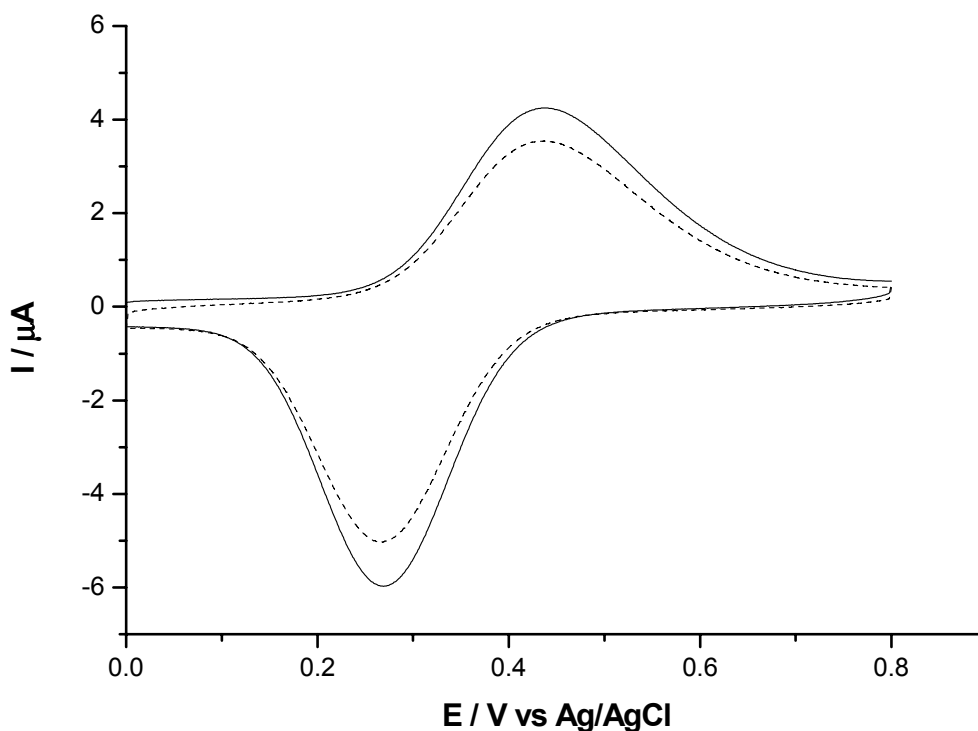

**S1.** CVs of a 20-layer Nafion-FA<sup>+</sup> film in 0.1 M NaCl supporting electrolyte, scan rate 50 mV s<sup>-1</sup> at the beginning (solid line) and after 50 cycles (dashed line).

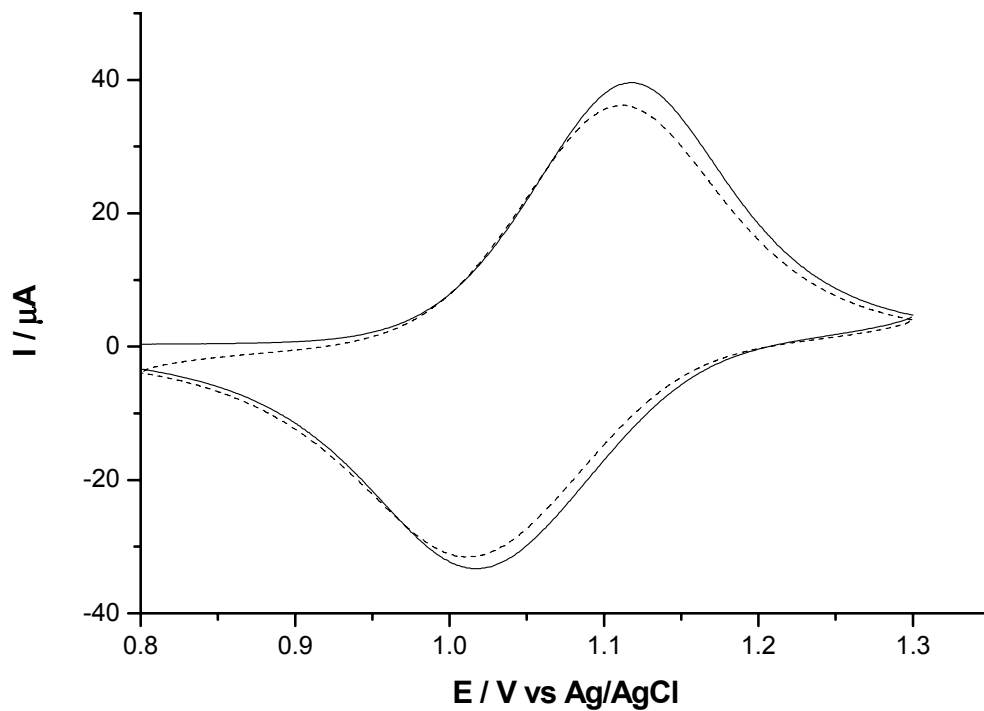

**S2.** CVs of a 20-layer Nafion-Ru(bpy)<sub>3</sub><sup>2+</sup> film in 0.1 M NaCl supporting electrolyte, scan rate 50 mV s<sup>-1</sup> at the beginning (solid line) and after 50 cycles (dashed line).

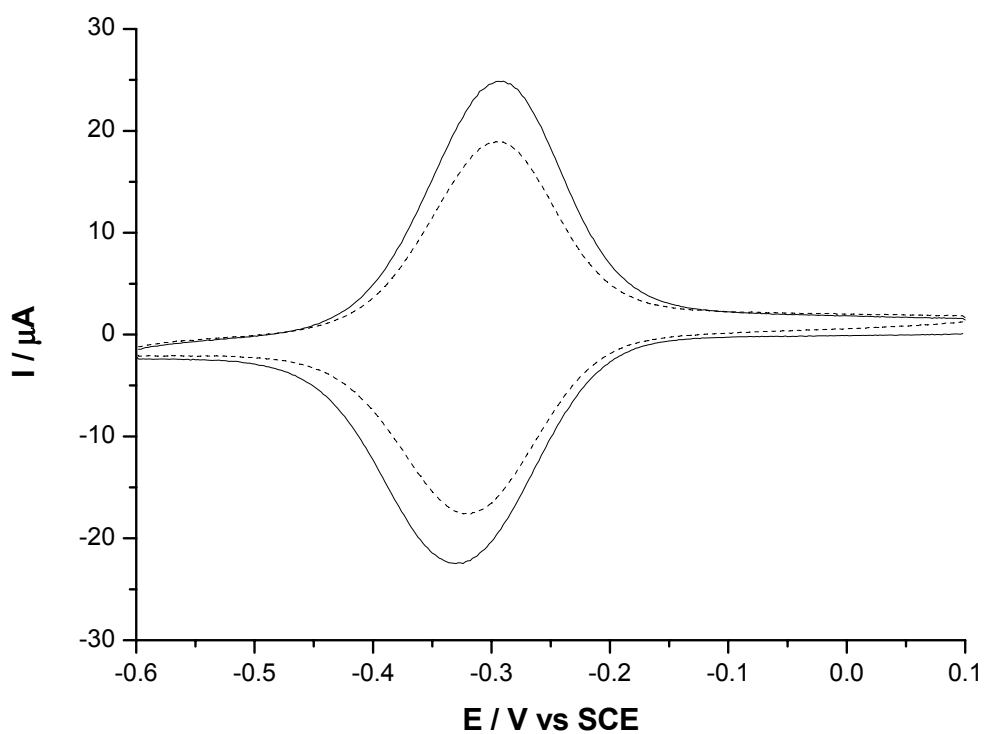

**S3.** CVs of a 20-layer Nafion-Ru[(NH<sub>3</sub>)<sub>6</sub>]<sup>3+</sup> film in 0.1 M NaCl supporting electrolyte, scan rate 100 mV s<sup>-1</sup> at the beginning (solid line) and after 100 cycles (dashed line).
